# Supplementary material for: Health System Cost of Post-Abortion Care (PAC): A Systematic Review
Source: Research Square preprint supplement (doi:10.21203/rs.3.rs-773107/v2), 2021-09-22
Supplement: Supplementary file 1 [file ed959d5705b7e6955ab749fc.docx]

Additional File 1.

**Table 3. Summarize information from 12 chosen studies**

| **Authors** | **Published year** | **Country** | **Timing** | **Costing tools** | **Base Currency ($USD)** | **Component cost** | | | | | |
| --- | --- | --- | --- | --- | --- | --- | --- | --- | --- | --- | --- |
| **Direct Medical Cost** | **Labor Cost** | **Supplies and Drugs Cost** | **Indirect Medical Cost** | **Overhead Cost** | **Capital Cost** |
| Benson J, et. al [11] | 2015 | Malawi | May to June, 2010 | savings, excel-based | 2010 | + | - | - | - | - | - |
| Ilboudo , et. al [22] | 2016 | Ouagadougou, Burkina Faso | April 2010 to 2011 | Excel spreadsheet | 2010 | + | + | + | - | + | - |
| Benson J, et. al [23] | 2012 | Nigeria | June to September, 2010 | savings, excel-based | 2012 | + | - | - | - | - | - |
| Johnston HB, et. al [24] | 2012 | Bangladesh | June to August, 2008 | Excel spreadsheet | 2008 | + | + | + | - | - | - |
| Prada E, et. al [25] | 2013 | Colombia | January to April, 2012 | Post-Abortion Care Costing Methodology (PACCM) | 2012 | + | + | + | - | - | - |
| Vlassoff M, et. al [10] | 2012 | Ethiopia | 2008 | Post-Abortion Care Costing Methodology (PACCM) | 2008 | + | - | - | - | - | - |
| Lince-Deroche N, et. al [17] | 2020 | Senegal | September 2016 to January 2017 | Post-Abortion Care Costing Methodology (PACCM) | 2016 | + | + | + | + | + | + |
| Baynes C, et. al [20] | 2019 | Tanzania | June to September, 2017 | Excel spreadsheet | 2016 | - | + | + | - | + | + |
| Koontz SL, et. al [9] | 2003 | El Salvador | February to November, 1999 | Modified Ipas cost model | 2003 | + | + | + | - | - | - |
| Vlassoff M, et. al [18] | 2015 | Rwanda | April to May, 2012 | Post-Abortion Care Costing Methodology (PACCM) | 2012 | + | + | + | + | + | + |
| Vlassoff M, et. al [21] | 2014 | Uganda | August to November, 2010 | Post-Abortion Care Costing Methodology (PACCM) | 2010 | + | + | + | + | + | + |
| Paul M, et. al [7] | 2015 | Sierra Leone | Jun to July, 2012 | excel-based, Modified Delphi approach | 2012 | + | - | - | - | - | - |

Table 3 shows that the component cost reported were varied across the studies.
