# Supplementary material for: Health System Cost of Post-Abortion Care (PAC): A Systematic Review
Source: Research Square preprint supplement (doi:10.21203/rs.3.rs-773107/v2), 2021-09-22
Supplement: Supplementary file 2 [file 50ebf0728545731103ddf031.docx]

Additional File 3.

**Table 5. Average/range cost of indirect medical cost for PAC treatment per patient**

| **Authors** |  | **(US$ in 2019)** | | | **($I in 2019)** | | |
| --- | --- | --- | --- | --- | --- | --- | --- |
| **MVA** | **D&C** | **Method of abortion were not specified** | **MVA** | **D&C** | **Method of abortion were not specified** |
| Ilboudo , et. al [22] | Indirect Medical Cost | NA | NA | NA | NA | NA | NA |
|  | Overhead Cost | NA | NA | 15.53 | NA | NA | 45.71 |
|  | Capital Cost | NA | NA | NA | NA | NA | NA |
| Lince-Deroche N, et. al [17] | Indirect Medical Cost | NA | NA | 6.53 - 7.26 | NA | NA | 15.97 - 17.76 |
|  | Overhead Cost | NA | NA | 2.12 - 2.53 | NA | NA | 5.18 - 6.19 |
|  | Capital Cost | NA | NA | 0.52 - 0.59 | NA | NA | 1.27 - 1.45 |
| Baynes C, et. al [20] | Indirect Medical Cost | NA | NA | NA | NA | NA | NA |
|  | Overhead Cost | NA | NA | 17.63 | NA | NA | 43.31 |
|  | Capital Cost | NA | NA | 14.28 | NA | NA | 35.08 |
| Vlassoff M, et. al [18] | Indirect Medical Cost | NA | NA | 51.44 | NA | NA | 148.76 |
|  | Overhead Cost | NA | NA | 36.17 | NA | NA | 104.61 |
|  | Capital Cost | NA | NA | 15.25 | NA | NA | 44.11 |
| Vlassoff M, et. al [21] | Indirect Medical Cost | NA | NA | 105.04 | NA | NA | 304.49 |
|  | Overhead Cost | NA | NA | 22.09 | NA | NA | 64.05 |
|  | Capital Cost | NA | NA | 82.94 | NA | NA | 240.44 |
