# Supplementary material for: Health System Cost of Post-Abortion Care (PAC): A Systematic Review
Source: Research Square preprint supplement (doi:10.21203/rs.3.rs-773107/v2), 2021-09-22
Supplement: Supplementary file 5 [file 38b3938562de5f3d0e0055a3.docx]

Additional File 3

**Table 6. Average/range cost of direct medical cost, by abortion complications***

|  | **Average/range of direct cost by type of complication ($ in 2019)** | | | | | **Average/range of direct by type of complication ($I in 2019)** | | | | |
| --- | --- | --- | --- | --- | --- | --- | --- | --- | --- | --- |
| **Incomplete Abortion** | **Shock** | **Sepsis** | **Lacerations** | **Perforations** | **Incomplete Abortion** | **Shock** | **Sepsis** | **Lacerations** | **Perforations** |
| Ilboudo , et. al [22] | 24.99 -30.44 | 29.07 - 52.11 | 88.61 - 110.4 | 38.65 - 69.42 | 86.27 | 73.56 - 89.6 | 85.58 - 153.36 | 260.8 - 324.93 | 113.77 - 204.31 | 253.91 |
| Prada E, et. al [25] | 7.86 - 21.36 | 308.03 - 410.34 | 69.7 - 98.93 | 26.98 - 60.7 | 103.42 - 251.82 | 19.13 - 51.94 | 749.15 - 997.95 | 169.51 - 240.6 | 65.61 - 147.64 | 251.54 - 612.44 |
| Vlassoff M, et. al [10] | NA | 23.41 - 23.65 | 12.43 - 25.57 | 19.79 | NA | NA | 65.41 - 66.08 | 34.74 - 71.44 | 55.29 | NA |
| Lince-Deroche N, et. al [17] | 15.77 | 39.53 | 25.74 | 36.33 | 38.52 | 38.53 | 96.60 | 62.91 | 88.79 | 94.13 |
| Baynes C, et. al [20] | 20.43 - 49.17 | 21.52 - 72.9 | 36.78 - 149.84 | 41.94 - 71.32 | 19.99 - 134.29 | 50.19 - 120.77 | 52.85 - 179.05 | 90.33 - 368.01 | 103 - 175.17 | 49.1 - 329.83 |
| Vlassoff M, et. al [18] | 103.14 | 67.22 | 31.36 | 56.43 | 175.91 | 298.27 | 194.40 | 90.70 | 163.19 | 103.14 |
| Vlassoff M, et. al [21] | 48.63 | 44.48 | 52.76 | 125.61 | 133.25 | 140.99 | 128.95 | 152.95 | 364.13 | 48.63 |

Table 6 shows the results of direct medical cost distinguished by five major abortion complications included in the WHO study on costing in its “Mother-Baby Package” [20].
