# Supplementary material for: Health System Cost of Post-Abortion Care (PAC): A Systematic Review
Source: Research Square preprint supplement (doi:10.21203/rs.3.rs-773107/v2), 2021-09-22
Supplement: Supplementary file 6 [file 58aaf06d0d3dc44d81afba2a.docx]

Additional File 2.

**Table 4. Average/range cost of direct medical cost for PAC treatment per patient**

| **Authors** |  | **($US in 2019)** | | | **($I in 2019)** | | |
| --- | --- | --- | --- | --- | --- | --- | --- |
| **MVA** | **D&C** | **Method of abortion were not specified** | **MVA** | **D&C** | **Method of abortion were not specified** |
| Benson J, et. al [11] | Direct Medical Cost | 15.2 - 139.19 | 22.22 - 161.42 | NA | 40.75 - 373.08 | 59.56 - 432.64 | NA |
|  | Labour Cost | NA | NA | NA | NA | NA | NA |
|  | Supplies and Drugs Cost | NA | NA | NA | NA | NA | NA |
| Ilboudo , et. al [22] | Direct Medical Cost | 27.16 - 30.89 | NA | NA | 79.93 - 90.91 | NA | NA |
|  | Labour Cost | 1.23 - 1.6 | NA | NA | 3.64 - 4.71 | NA | NA |
|  | Supplies and Drugs Cost | 25.56 - 29.65 | NA | NA | 75.25 - 87.26 | NA | NA |
| Benson J, et. al [23] | Direct Medical Cost | 74.19 - 137.15 | NA | NA | 168.06 - 310.66 | NA | NA |
|  | Labour Cost | NA | NA | NA | NA | NA | NA |
|  | Supplies and Drugs Cost | NA | NA | NA | NA | NA | NA |
| Johnston HB, et. al [24] | Direct Medical Cost | 15.71 - 27.68 | 15.71 - 103.85 | NA | 42.13 - 74.23 | 42.13 - 278.46 | NA |
|  | Labour Cost | 7.15 - 8.48 | 5.94 - 13.46 | NA | 19.18 - 22.76 | 15.95 - 36.09 | NA |
|  | Supplies and Drugs Cost | 7.22 - 20.53 | 13.33 - 90.38 | NA | 19.37 - 55.05 | 35.74 - 242.33 | NA |
| Prada E, et. al [25] | Direct Medical Cost | 50.58 - 212.47 | NA | NA | 123.03 - 516.75 | NA | NA |
|  | Labour Cost | NA | NA | 42.72 - 214.72 | 103.89 - 522.21 | NA | NA |
|  | Supplies and Drugs Cost | NA | NA | 7.86 - 24.73 | 19.13 - 60.15 | NA | NA |
| Vlassoff M, et. al [10] | Direct Medical Cost | NA | NA | 43.17 | NA | NA | 120.6 |
|  | Labour Cost | NA | NA | NA | NA | NA | NA |
|  | Supplies and Drugs Cost | NA | NA | NA | NA | NA | NA |
| Lince-Deroche N, et. al [17] | Direct Medical Cost | NA | NA | 25.03 - 34.07 | NA | NA | 61.17 - 83.27 |
|  | Labour Cost | NA | NA | 3.7 - 7.31 | NA | NA | 9.05 - 17.86 |
|  | Supplies and Drugs Cost | NA | NA | 20.85 - 26.76 | NA | NA | 50.95 - 65.4 |
| Baynes C, et. al [20] | Direct Medical Cost | NA | NA | NA | NA | NA | NA |
|  | Labour Cost | NA | NA | 8.94 - 30.06 | NA | NA | 21.97 - 73.83 |
|  | Supplies and Drugs Cost | NA | NA | 11.89 - 25.22 | NA | NA | 29.21 - 61.95 |
| Koontz SL, et. al [9] | Direct Medical Cost | 58.82 - 105.39 | 65.22 - 240.75 | NA | 128.4 - 230.05 | 142.37 - 525.51 | NA |
|  | Labour Cost | 7.62 - 21.78 | 9.94 - 30.91 | NA | 16.64 - 47.55 | 21.69 - 67.47 | NA |
|  | Supplies and Drugs Cost | 9.39 - 18.24 | 11.71 - 102.81 | NA | 20.5 - 39.82 | 25.56 - 224.41 | NA |
| Vlassoff M, et. al [18] | Direct Medical Cost | NA | NA | 48.71 | NA | NA | 140.86 |
|  | Labour Cost | NA | NA | 19.19 | NA | NA | 55.49 |
|  | Supplies and Drugs Cost | NA | NA | 29.52 | NA | NA | 85.37 |
| Vlassoff M, et. al [21] | Direct Medical Cost | NA | NA | 41.34 | NA | NA | 119.86 |
|  | Labour Cost | NA | NA | 13.05 | NA | NA | 37.84 |
|  | Supplies and Drugs Cost | NA | NA | 28.28 | NA | NA | 81.98 |
| Paul M, et. al [7] | Direct Medical Cost | 68.57-109.04 | NA | NA | 243.27 - 386.85 | NA | NA |
|  | Labour Cost | NA | NA | NA | NA | NA | NA |
|  | Supplies and Drugs Cost | NA | NA | NA | NA | NA | NA |

Table 4 provides the summary of (i) direct medical costs, (ii) labour costs and (iii) supplies and drugs costs, in 2019 US dollars and international dollars, of post-abortion care (PAC) from 12 countries.
